# Supplementary material
Source: ML conference proceedings conference paper supplement (https://openreview.net/forum?id=fmf8605lKj)
Supplement: supplementary_material [file attachment]

# Corrections to Table 1

Anonymous Authors

## 1 REVISED VERSION OF TABLE 1

We noticed inaccuracies in the underlined annotations of Table 1 in the existing version, with some instances of incorrect or missing

underlining. Table 1 presents the corrected version. I apologize for any inconvenience this might have caused and appreciate your understanding.

**Table 1: Document ranking performance averaged across participants, with our method (*Brain-Aug* & *Brain+Unsup*) marked by a ★. Best results are in boldface, and the second-best results are underlined. \*/† indicates Brain-Aug / Brain+Unsup significantly outperforms the baseline ( $p \leq 0.05$ , paired t-test), respectively.**

| Dataset    | Query            | BM25                 |                      |                           |                      | RepLLaMA             |                      |                      |                      |
|------------|------------------|----------------------|----------------------|---------------------------|----------------------|----------------------|----------------------|----------------------|----------------------|
|            |                  | N@10                 | N@20                 | R@20                      | MAP                  | N@10                 | N@20                 | R@20                 | MAP                  |
| Pereira's  | original         | 0.643 <sup>*,†</sup> | 0.664 <sup>*,†</sup> | 0.888 <sup>*,†</sup>      | 0.594 <sup>*,†</sup> | 0.878                | 0.881 <sup>*,†</sup> | 0.964 <sup>*,†</sup> | <u>0.858</u>         |
|            | Unsup-Aug        | 0.646 <sup>*,†</sup> | 0.655 <sup>*,†</sup> | 0.924 <sup>*,†</sup>      | 0.590 <sup>*,†</sup> | 0.872 <sup>*,†</sup> | 0.877 <sup>*,†</sup> | 0.951 <sup>*,†</sup> | 0.855                |
|            | Brain-Aug★       | <u>0.671</u>         | <b>0.691</b>         | <b>0.941</b>              | <b>0.618</b>         | <b>0.883</b>         | <b>0.887</b>         | <b>0.980</b>         | <b>0.859</b>         |
|            | Unsup+Brain-Aug★ | <b>0.673</b>         | <u>0.686</u>         | <u>0.936</u>              | <u>0.615</u>         | <u>0.878</u>         | <u>0.882</u>         | <u>0.975</u>         | 0.853                |
| Huth's     | original         | 0.297 <sup>*,†</sup> | 0.326 <sup>*,†</sup> | 0.536 <sup>*,†</sup>      | 0.264 <sup>*,†</sup> | 0.299 <sup>*,†</sup> | 0.328 <sup>*,†</sup> | 0.520 <sup>*,†</sup> | 0.275 <sup>*,†</sup> |
|            | Unsup-Aug        | 0.291 <sup>*,†</sup> | 0.320 <sup>*,†</sup> | <u>0.575</u> <sup>†</sup> | 0.259 <sup>*,†</sup> | 0.302 <sup>*,†</sup> | 0.333 <sup>*,†</sup> | 0.537 <sup>*,†</sup> | 0.276 <sup>*,†</sup> |
|            | Brain-Aug★       | <u>0.306</u>         | <u>0.340</u>         | 0.569 <sup>†</sup>        | <b>0.273</b>         | <b>0.310</b>         | <b>0.342</b>         | <u>0.550</u>         | <b>0.281</b>         |
|            | Unsup+Brain-Aug★ | <b>0.309</b>         | <b>0.342</b>         | <b>0.580</b>              | <u>0.269</u>         | <u>0.308</u>         | <u>0.340</u>         | <b>0.552</b>         | <u>0.279</u>         |
| Narratives | original         | 0.419 <sup>*,†</sup> | 0.434 <sup>*,†</sup> | 0.629 <sup>*,†</sup>      | 0.355 <sup>*,†</sup> | 0.413 <sup>*,†</sup> | 0.426 <sup>*,†</sup> | 0.611 <sup>*,†</sup> | 0.351 <sup>*,†</sup> |
|            | Unsup-Aug        | 0.440                | 0.452 <sup>†</sup>   | <u>0.670</u> <sup>†</sup> | 0.367 <sup>*,†</sup> | 0.416 <sup>*,†</sup> | 0.431 <sup>*,†</sup> | 0.629 <sup>*,†</sup> | 0.356 <sup>*,†</sup> |
|            | Brain-Aug★       | <u>0.441</u>         | <u>0.458</u>         | 0.669                     | <b>0.382</b>         | <u>0.430</u>         | <b>0.446</b>         | <u>0.641</u>         | <b>0.382</b>         |
|            | Unsup+Brain-Aug★ | <b>0.445</b>         | <b>0.462</b>         | <b>0.678</b>              | <b>0.382</b>         | <b>0.432</b>         | <b>0.446</b>         | <b>0.642</b>         | <u>0.380</u>         |
